# Supplementary material for: Multi-Omics Analysis Reveals Age-Related Microbial and Metabolite Alterations in Non-Human Primates
Source: MDPI journal article supplement (doi:10.3390/microorganisms11102406), 2023-09-26
Supplement: s1 [file s1]

## Supplementary files

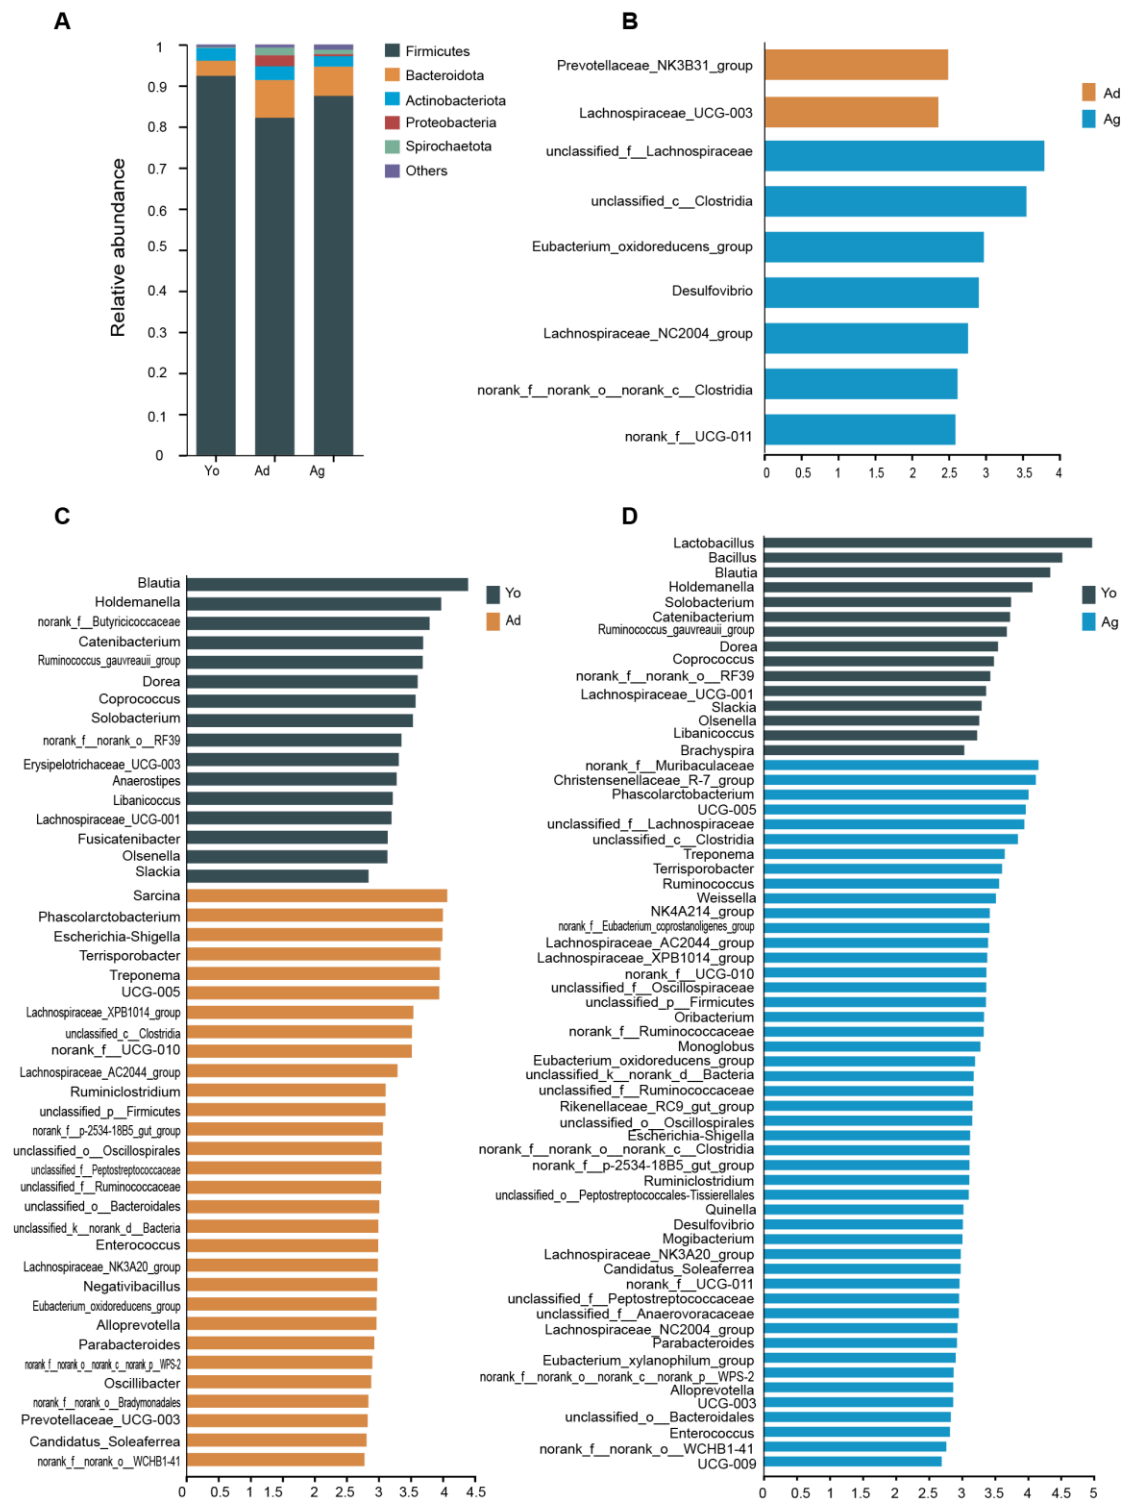

**Figure S1.** The composition of gut microbiota and discriminative genera observed in pairwise comparisons among juvenile, adult and old groups. (A) Bar plots showing the relative abundance of microbiota of three groups at phylum level. (B) 9 genera attributed to distinguishing adult from oldness. (C) 46 genera were responsible for distinguishing juvenile from adult. (D) 63 genera accounted for distinguishing juvenile from oldness. Differentiating

gut genera identified by LefSe with LDA effect size  $\geq 2$  and  $P \leq 0.05$ . Yo, juvenile,  $n = 9$ ; Ad, adult,  $n = 12$ ; Ag, oldness,  $n = 15$ .

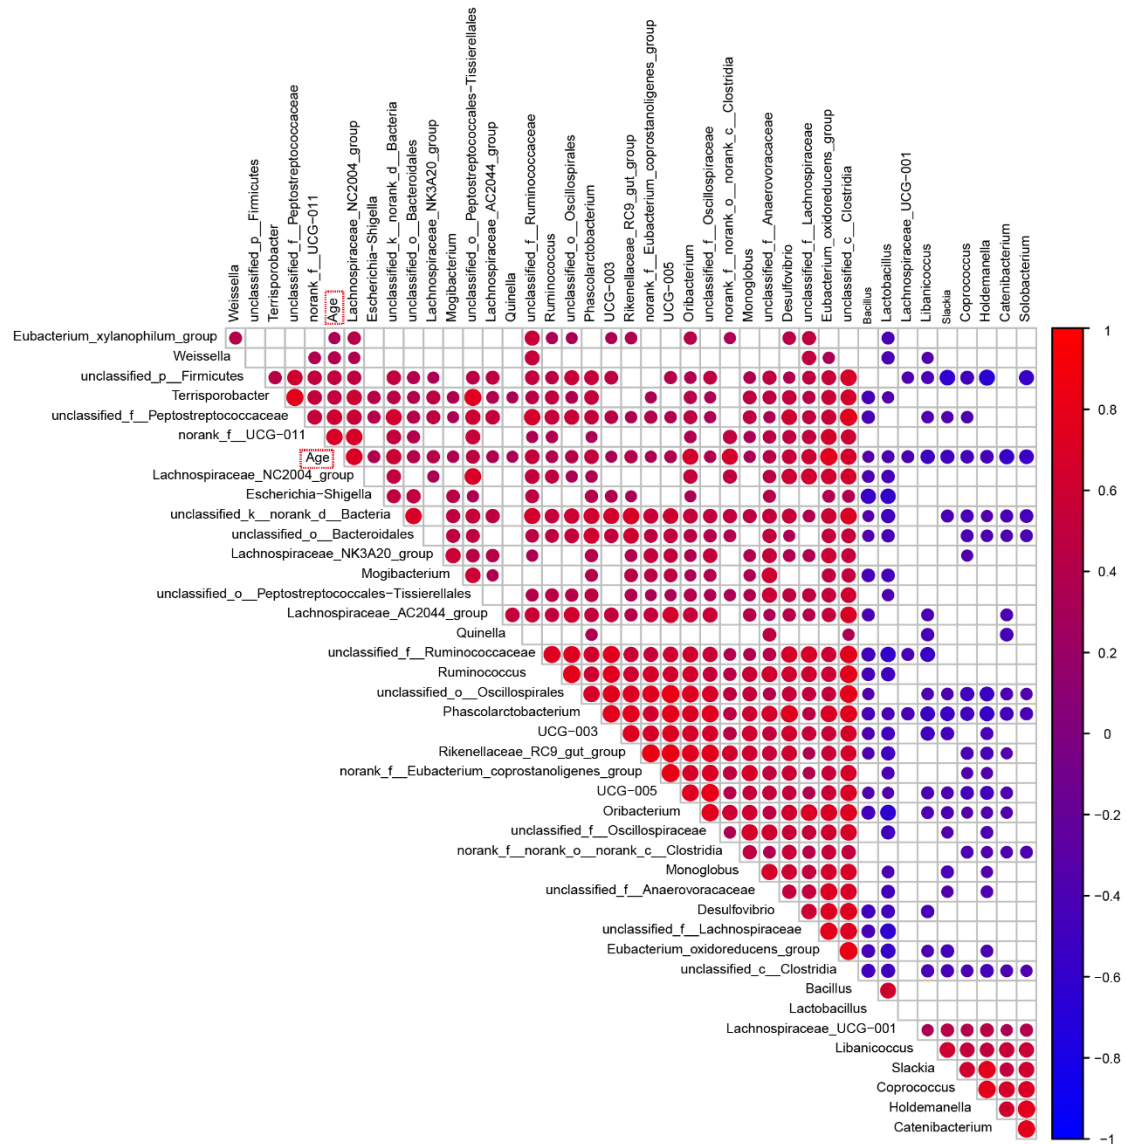

**Figure S2.** Correlation analysis of differential gut microbiota with age. The microbes used for correlation calculations met the criterion of significant differences between at least two age groups (see Figures S1B-D). In total, there are 41 discriminative microbes significantly correlated with age (the heatmap exclusively displayed age-related microbes). The size and color of each scatter plot point showed the  $p$  values of Spearman's correlation and correlation coefficient values (red points represented positive correlations,  $P < 0.05$  and  $R > 0.3$ ; blue points represented negative correlations,  $P < 0.05$  and  $R < -0.3$ ).

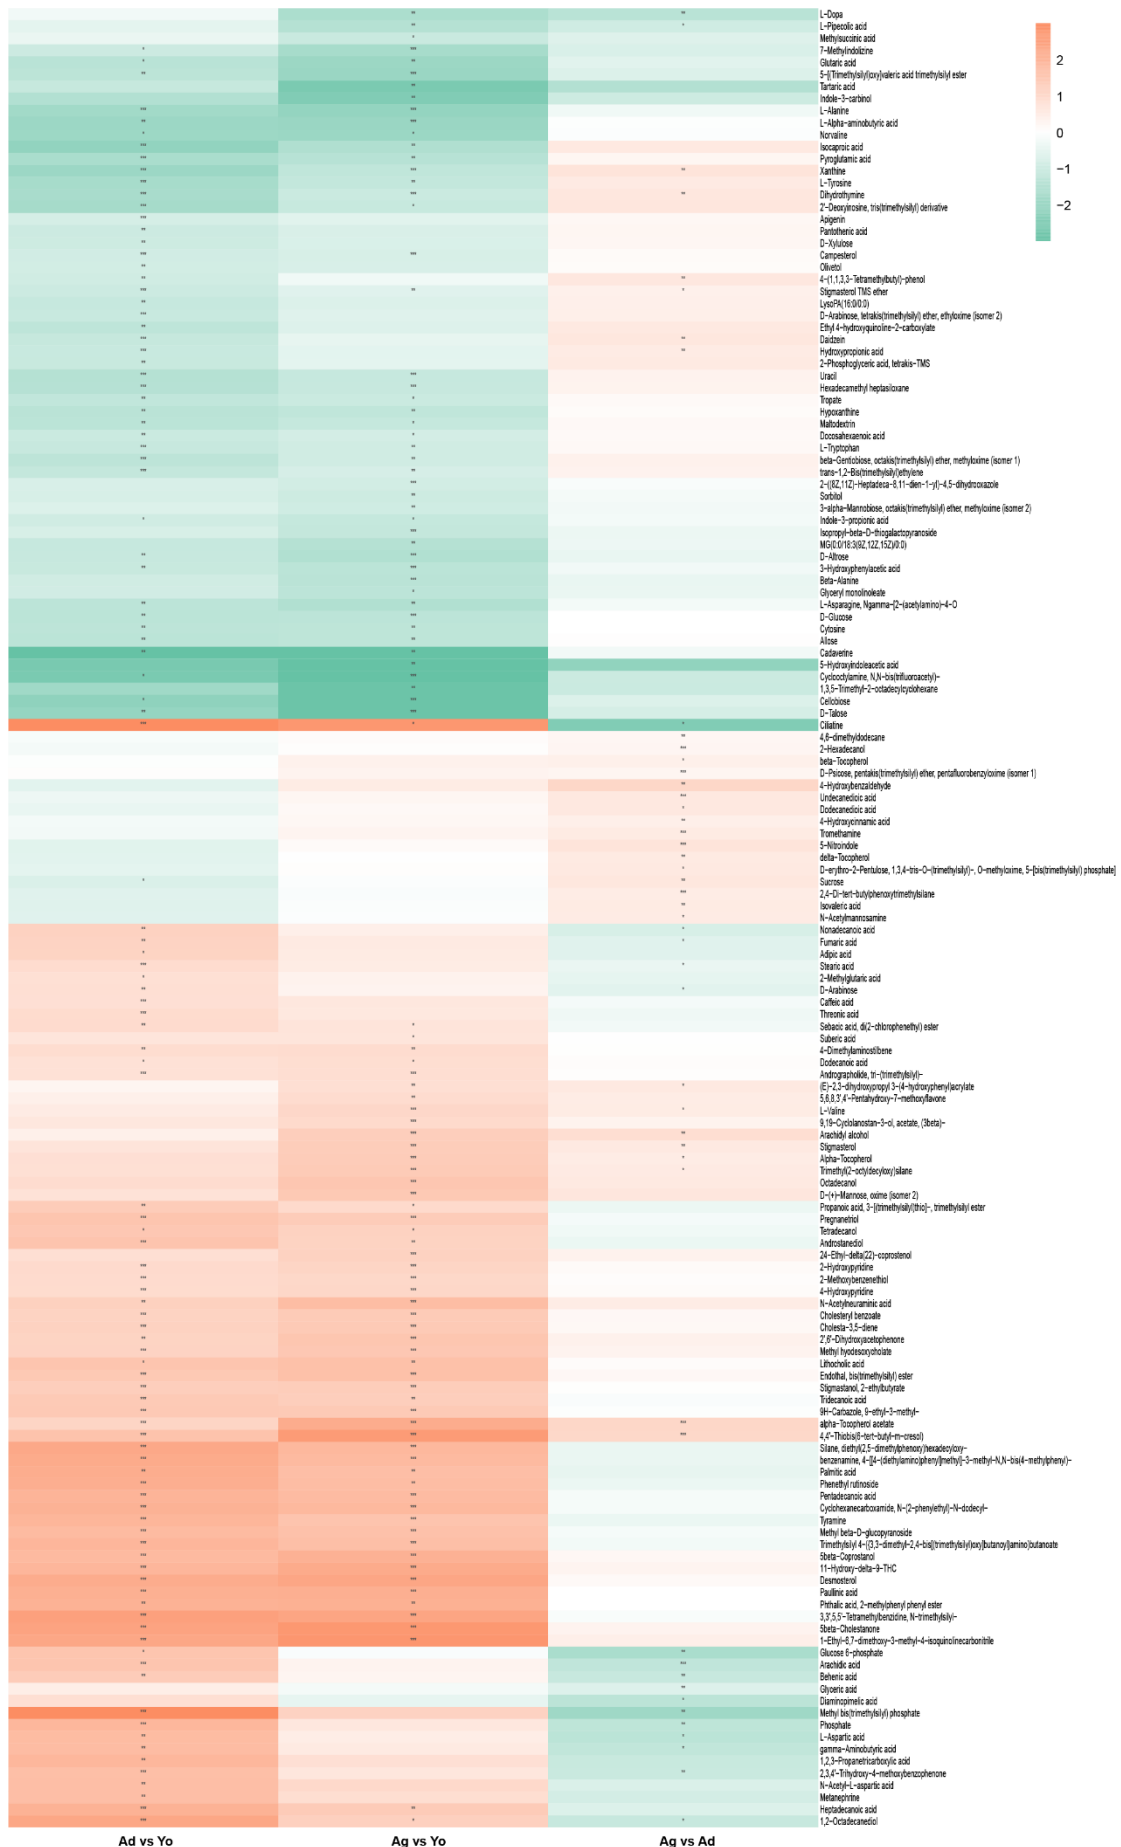

**Figure S3.** Changes in fecal metabolites discerned from pairwise comparisons among the juvenile, adult, and old groups. A total of 151 fecal metabolites showed significant differences between at least two age groups. The statistical significance was denoted on the squares ( $*p < 0.05$  and  $VIP > 1$ ;  $**p < 0.01$  and  $VIP > 1$ ;  $***p < 0.001$  and  $VIP > 1$ ). In pairwise comparisons, red squares indicate metabolites were significantly up-regulated in the higher-age group (logarithmic transformation of fold change values  $> 0$ ), while green squares indicate those were significantly down-regulated (logarithmic transformation of fold change values  $< 0$ ) compared to the lower-age group. Yo, juvenile,  $n = 7$ ; Ad, adult,  $n = 10$ ; Ag, oldness,  $n = 13$ .

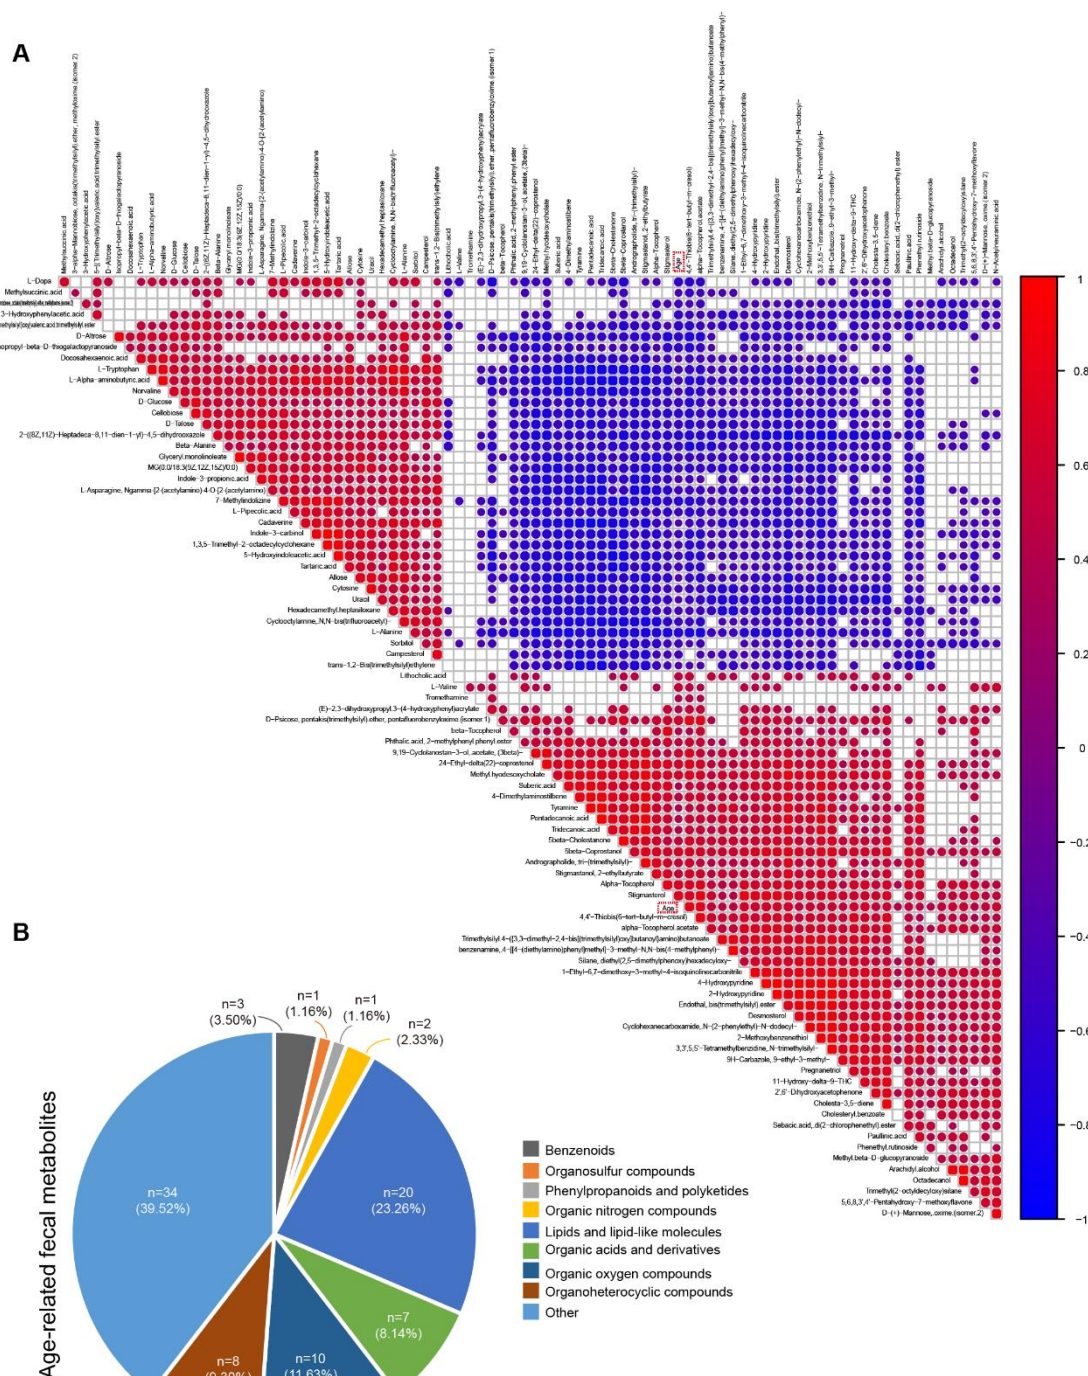

**Figure S4.** Correlation analysis of differential fecal metabolites with age. The metabolites used for correlation calculations met the criterion of significant differences between at least two age groups (see Figures S2). **(A)** There are a total of 86 differential metabolites significantly correlated with age (the heatmap exclusively displayed age-related metabolites). The size and color of each scatter plot point showed the  $p$  values of Spearman's correlation and correlation coefficient values (red points represented positive correlations,  $P < 0.05$  and  $R > 0.3$ ; blue points represented negative correlations,  $P < 0.05$  and  $R < -0.3$ ). **(B)** A pie chart illustrated the 86 age-related metabolites mainly belong to four categories: lipids and lipid-like molecules, organic oxygen compounds, organic acids and derivatives, and organoheterocyclic compounds.

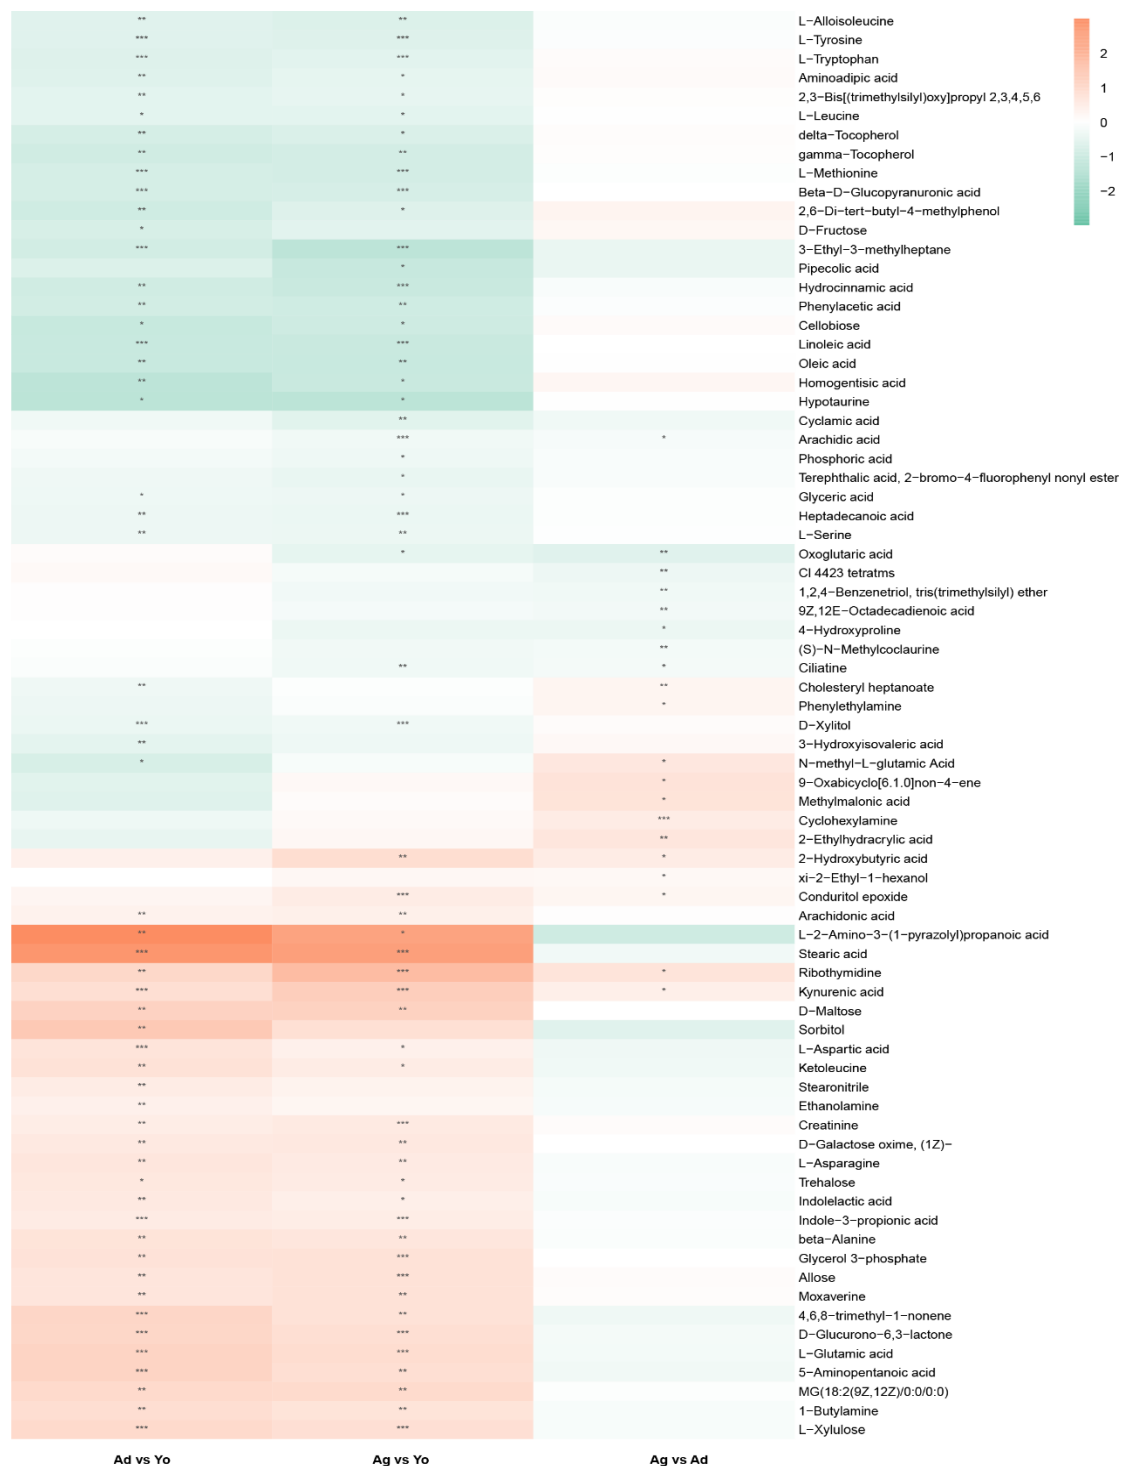

**Figure S5.** Alterations in serum metabolites observed in pairwise comparisons among juveniles, adults and old groups. A total of 75 fecal metabolites showed significant differences between at least two age groups. The statistical significance was denoted on the squares (\*  $p < 0.05$  and  $VIP > 1$ ; \*\*  $p < 0.01$  and  $VIP > 1$ ; \*\*\*  $p < 0.001$  and  $VIP > 1$ ). In pairwise comparisons, red squares indicate metabolites were significantly up-regulated in the higher-age group (logarithmic transformation of fold change values  $> 0$ ), while green squares indicate those were significantly down-regulated (logarithmic transformation of fold change values  $< 0$ ) compared to the lower-age group. Yo, juvenile,  $n = 9$ ; Ad, adult,  $n = 12$ ; Ag, oldness,  $n = 15$ .



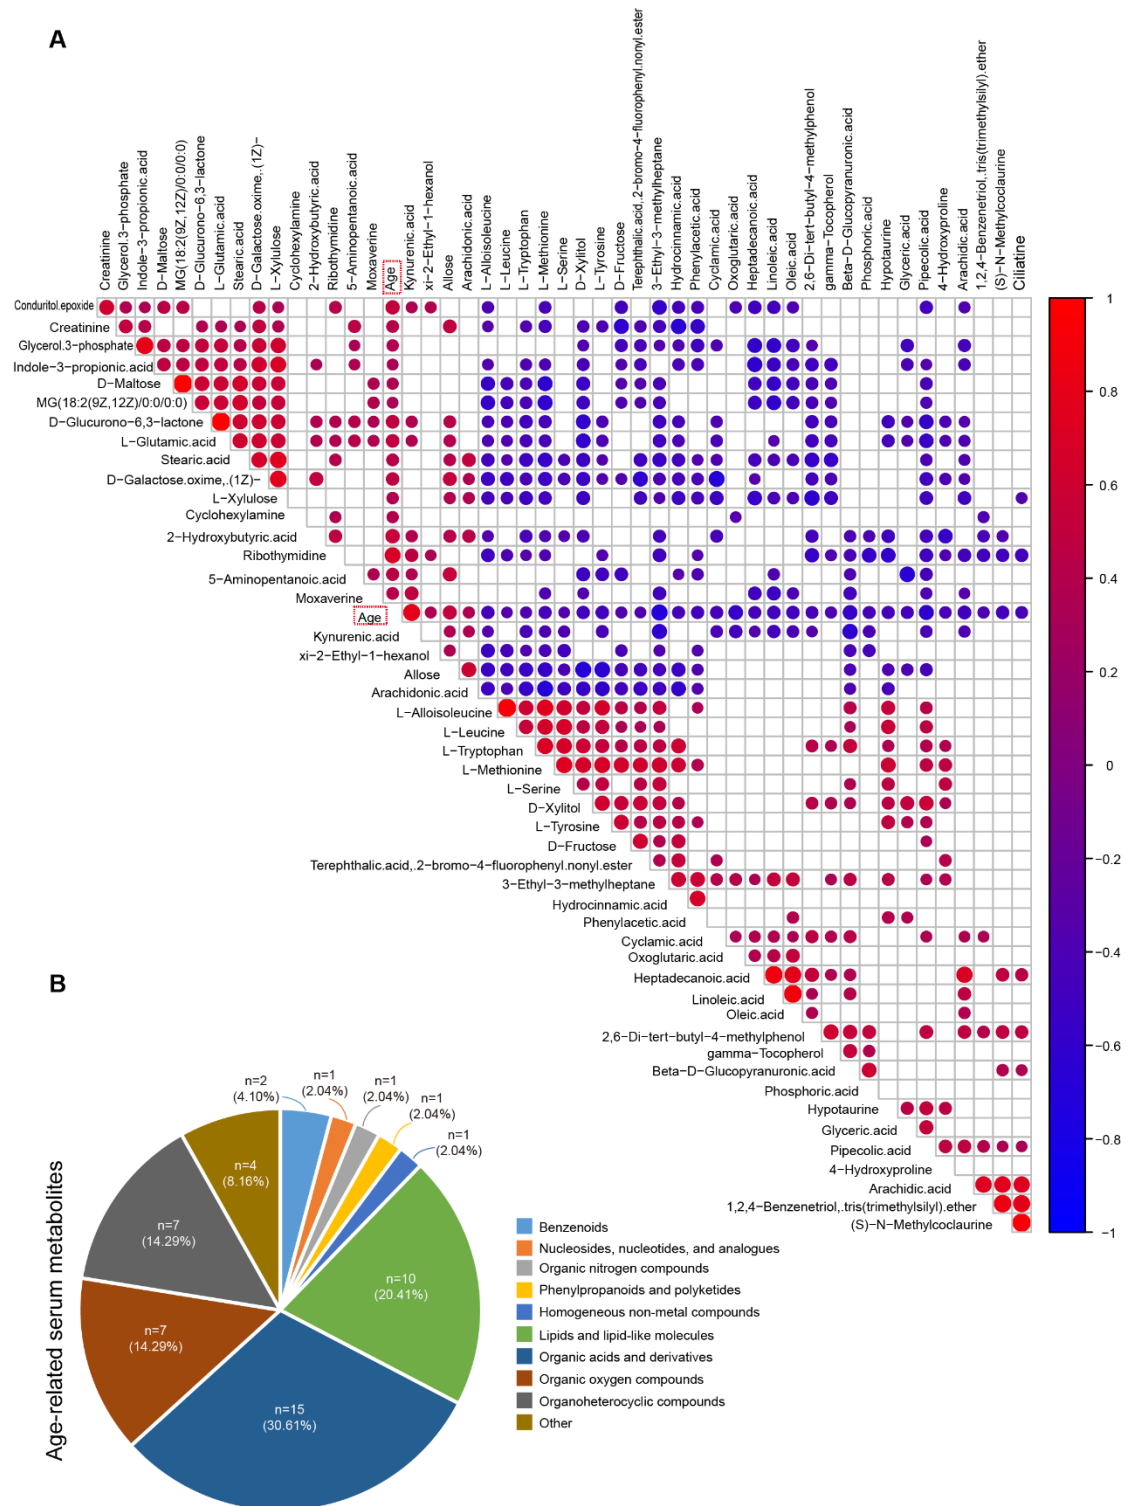

**Figure S6.** Correlation analysis of differential serum metabolites with age. The metabolites used for correlation calculations met the criterion of significant differences between at least two age groups (see Figures S3). (A) There are a total of 49 differential metabolites significantly correlated with age (the heatmap exclusively displayed age-related metabolites). The size and color of each scatter plot point showed the  $p$  values of Spearman's correlation and correlation coefficient values (red points represented positive correlations,  $P < 0.05$  and  $R > 0.3$ ; blue points represented negative correlations,  $P < 0.05$  and  $R < -0.3$ ). (B) Consistent with the fecal

metabolome, a pie chart revealed the 49 age-related metabolites mainly belong to four categories, which are organic acids and derivatives, lipids and lipid-like molecules, organic oxygen compounds, and organoheterocyclic compounds.

**Table S1. The detail characteristics of the recruited rhesus macaques.**

| Sample ID | Gender | Age | Stage    | Dugs-Free # | Health Status # | Host    | Geographical Region * |
|-----------|--------|-----|----------|-------------|-----------------|---------|-----------------------|
| Yo1       | Male   | 3   | Juvenile | Yes         | Normal          | Chinese | Xishan                |
| Yo2       | Male   | 3   | Juvenile | Yes         | Normal          | Chinese | Xishan                |
| Yo3       | Male   | 3   | Juvenile | Yes         | Normal          | Chinese | Xishan                |
| Yo4       | Male   | 3   | Juvenile | Yes         | Normal          | Chinese | Xishan                |
| Yo5       | Male   | 3   | Juvenile | Yes         | Normal          | Chinese | Xishan                |
| Yo6       | Male   | 3   | Juvenile | Yes         | Normal          | Chinese | Xishan                |
| Yo7       | Male   | 3   | Juvenile | Yes         | Normal          | Chinese | Xishan                |
| Yo8       | Male   | 3   | Juvenile | Yes         | Normal          | Chinese | Xishan                |
| Yo9       | Male   | 3   | Juvenile | Yes         | Normal          | Chinese | Xishan                |
| Ad1       | Male   | 9   | Adult    | Yes         | Normal          | Chinese | Xishan                |
| Ad2       | Male   | 9   | Adult    | Yes         | Normal          | Chinese | Xishan                |
| Ad3       | Male   | 11  | Adult    | Yes         | Normal          | Chinese | Xishan                |
| Ad4       | Male   | 11  | Adult    | Yes         | Normal          | Chinese | Xishan                |
| Ad5       | Male   | 9   | Adult    | Yes         | Normal          | Chinese | Xishan                |
| Ad6       | Male   | 12  | Adult    | Yes         | Normal          | Chinese | Xishan                |
| Ad7       | Male   | 13  | Adult    | Yes         | Normal          | Chinese | Xishan                |
| Ad8       | Male   | 8   | Adult    | Yes         | Normal          | Chinese | Xishan                |
| Ad9       | Male   | 10  | Adult    | Yes         | Normal          | Chinese | Xishan                |
| Ad10      | Male   | 10  | Adult    | Yes         | Normal          | Chinese | Xishan                |
| Ad11      | Male   | 8   | Adult    | Yes         | Normal          | Chinese | Xishan                |
| Ad12      | Male   | 15  | Adult    | Yes         | Normal          | Chinese | Xishan                |
| Ag1       | Male   | 26  | Elderly  | Yes         | Normal          | Chinese | Xishan                |
| Ag2       | Male   | 20  | Elderly  | Yes         | Normal          | Chinese | Xishan                |
| Ag3       | Male   | 23  | Elderly  | Yes         | Normal          | Chinese | Xishan                |
| Ag4       | Male   | 26  | Elderly  | Yes         | Normal          | Chinese | Xishan                |
| Ag5       | Male   | 16  | Elderly  | Yes         | Normal          | Chinese | Xishan                |
| Ag6       | Male   | 24  | Elderly  | Yes         | Normal          | Chinese | Xishan                |
| Ag7       | Male   | 23  | Elderly  | Yes         | Normal          | Chinese | Xishan                |
| Ag8       | Male   | 25  | Elderly  | Yes         | Normal          | Chinese | Xishan                |
| Ag9       | Male   | 23  | Elderly  | Yes         | Normal          | Chinese | Xishan                |
| Ag10      | Male   | 22  | Elderly  | Yes         | Normal          | Chinese | Xishan                |
| Ag11      | Male   | 24  | Elderly  | Yes         | Normal          | Chinese | Xishan                |
| Ag12      | Male   | 23  | Elderly  | Yes         | Normal          | Chinese | Xishan                |
| Ag13      | Male   | 22  | Elderly  | Yes         | Normal          | Chinese | Xishan                |
| Ag14      | Male   | 18  | Elderly  | Yes         | Normal          | Chinese | Xishan                |
| Ag15      | Male   | 16  | Elderly  | Yes         | Normal          | Chinese | Xishan                |

# Confirmation based on veterinary diagnosis and quarantine records. \* The region is located in the temperate zone and has a subtropical monsoon marine climate (E 120°19' 19"N 31° 07'05").
